# Supplementary material
Source: publisher figshare collection journal article supplement (https://acs.figshare.com/ndownloader/files/4780030)
Supplement: Supplementary file 1 [file 4780030]

 
data_qtet 
 
_audit_creation_method            SHELXL-97 
_chemical_name_systematic 
; 
 ? 
; 
_chemical_name_common             ? 
_chemical_melting_point           ? 
_chemical_formula_moiety          ? 
_chemical_formula_sum 
 'C20 H20 Cu6 I4 N4 Se4 W' 
_chemical_formula_weight          1704.93 
 
loop_ 
 _atom_type_symbol 
 _atom_type_description 
 _atom_type_scat_dispersion_real 
 _atom_type_scat_dispersion_imag 
 _atom_type_scat_source 
 'C'  'C'   0.0033   0.0016 
 'International Tables Vol C Tables 4.2.6.8 and 6.1.1.4' 
 'H'  'H'   0.0000   0.0000 
 'International Tables Vol C Tables 4.2.6.8 and 6.1.1.4' 
 'N'  'N'   0.0061   0.0033 
 'International Tables Vol C Tables 4.2.6.8 and 6.1.1.4' 
 'Cu'  'Cu'   0.3201   1.2651 
 'International Tables Vol C Tables 4.2.6.8 and 6.1.1.4' 
 'Se'  'Se'  -0.0929   2.2259 
 'International Tables Vol C Tables 4.2.6.8 and 6.1.1.4' 
 'I'  'I'  -0.4742   1.8119 
 'International Tables Vol C Tables 4.2.6.8 and 6.1.1.4' 
 'W'  'W'  -0.8490   6.8722 
 'International Tables Vol C Tables 4.2.6.8 and 6.1.1.4' 
 
_symmetry_cell_setting            tetragonal 
_symmetry_space_group_name_H-M    I-42d
 
loop_ 
 _symmetry_equiv_pos_as_xyz 
 'x, y, z' 
 '-x, -y, z' 
 'y, -x, -z' 
 '-y, x, -z' 
 '-x+1/2, y, -z+3/4' 
 'x+1/2, -y, -z+3/4' 
 '-y+1/2, -x, z+3/4' 
 'y+1/2, x, z+3/4' 
 'x+1/2, y+1/2, z+1/2' 
 '-x+1/2, -y+1/2, z+1/2' 
 'y+1/2, -x+1/2, -z+1/2' 
 '-y+1/2, x+1/2, -z+1/2' 
 '-x+1, y+1/2, -z+5/4' 
 'x+1, -y+1/2, -z+5/4' 
 '-y+1, -x+1/2, z+5/4' 
 'y+1, x+1/2, z+5/4' 
 
_cell_length_a                    14.811(2) 
_cell_length_b                    14.811(2) 
_cell_length_c                    15.595(3) 
_cell_angle_alpha                 90.00 
_cell_angle_beta                  90.00 
_cell_angle_gamma                 90.00 
_cell_volume                      3421.1(10) 
_cell_formula_units_Z             4 
_cell_measurement_temperature     120(2) 
_cell_measurement_reflns_used     8839 
_cell_measurement_theta_min       1.57  
_cell_measurement_theta_max       26.39 
 
_exptl_crystal_description        block
_exptl_crystal_colour             black
_exptl_crystal_size_max           0.30 
_exptl_crystal_size_mid           0.20 
_exptl_crystal_size_min           0.20 
_exptl_crystal_density_meas       ? 
_exptl_crystal_density_diffrn     3.310 
_exptl_crystal_density_method     'not measured' 
_exptl_crystal_F_000              3056 
_exptl_absorpt_coefficient_mu     14.891 
_exptl_absorpt_correction_type    none 
_exptl_absorpt_correction_T_min   ? 
_exptl_absorpt_correction_T_max   ? 
_exptl_absorpt_process_details    ? 
 
_exptl_special_details 
; 
 ? 
; 
 
_diffrn_ambient_temperature       120(2) 
_diffrn_radiation_wavelength      0.71073 
_diffrn_radiation_type            MoK\a 
_diffrn_radiation_source          'fine-focus sealed tube' 
_diffrn_radiation_monochromator   graphite 
_diffrn_measurement_device_type   'stoe stad'
_diffrn_measurement_method        'area detector' 
_diffrn_detector_area_resol_mean  6.667 
_diffrn_standards_number          ? 
_diffrn_standards_interval_count  ? 
_diffrn_standards_interval_time   ? 
_diffrn_standards_decay_%         ? 
_diffrn_reflns_number             13396 
_diffrn_reflns_av_R_equivalents   0.0683 
_diffrn_reflns_av_sigmaI/netI     0.0568 
_diffrn_reflns_limit_h_min        -17 
_diffrn_reflns_limit_h_max        18 
_diffrn_reflns_limit_k_min        -17 
_diffrn_reflns_limit_k_max        18 
_diffrn_reflns_limit_l_min        -20 
_diffrn_reflns_limit_l_max        20 
_diffrn_reflns_theta_min          3.26 
_diffrn_reflns_theta_max          27.19 
_reflns_number_total              1907 
_reflns_number_gt                 1896 
_reflns_threshold_expression      >2sigma(I) 
 
_computing_data_collection        'stoe winexpose' 
_computing_cell_refinement        'stoe winexpose' 
_computing_data_reduction         'stoe winexpose' 
_computing_structure_solution     'SHELXS-97 (Sheldrick, 1990)' 
_computing_structure_refinement   'SHELXL-97 (Sheldrick, 1997)' 
_computing_molecular_graphics     'SHELXL-97 (Sheldrick, 1997)' 
_computing_publication_material   'SHELXL-97 (Sheldrick, 1997)' 
 
_refine_special_details 
; 
 Refinement of F^2^ against ALL reflections.  The weighted R-factor wR and 
 goodness of fit S are based on F^2^, conventional R-factors R are based 
 on F, with F set to zero for negative F^2^. The threshold expression of 
 F^2^ > 2sigma(F^2^) is used only for calculating R-factors(gt) etc. and is 
 not relevant to the choice of reflections for refinement.  R-factors based 
 on F^2^ are statistically about twice as large as those based on F, and R- 
 factors based on ALL data will be even larger. 
; 
 
_refine_ls_structure_factor_coef  Fsqd  
_refine_ls_matrix_type            full 
_refine_ls_weighting_scheme       calc  
_refine_ls_weighting_details 
 'calc w=1/[\s^2^(Fo^2^)+(0.0809P)^2^+6.4139P] where P=(Fo^2^+2Fc^2^)/3' 
_atom_sites_solution_primary      direct 
_atom_sites_solution_secondary    difmap 
_atom_sites_solution_hydrogens    geom 
_refine_ls_hydrogen_treatment     constr 
_refine_ls_extinction_method      none 
_refine_ls_extinction_coef        ? 
_refine_ls_abs_structure_details 
 'Flack H D (1983), Acta Cryst. A39, 876-881' 
_refine_ls_abs_structure_Flack    0.035(12) 
_refine_ls_number_reflns          1907 
_refine_ls_number_parameters      85 
_refine_ls_number_restraints      0 
_refine_ls_R_factor_all           0.0467 
_refine_ls_R_factor_gt            0.0466 
_refine_ls_wR_factor_ref          0.1177 
_refine_ls_wR_factor_gt           0.1175 
_refine_ls_goodness_of_fit_ref    1.108 
_refine_ls_restrained_S_all       1.108 
_refine_ls_shift/su_max           0.000 
_refine_ls_shift/su_mean          0.000 
 
loop_ 
 _atom_site_label 
 _atom_site_type_symbol 
 _atom_site_fract_x 
 _atom_site_fract_y 
 _atom_site_fract_z 
 _atom_site_U_iso_or_equiv 
 _atom_site_adp_type 
 _atom_site_occupancy 
 _atom_site_symmetry_multiplicity 
 _atom_site_calc_flag 
 _atom_site_refinement_flags 
 _atom_site_disorder_assembly 
 _atom_site_disorder_group 
W1 W 0.0000 0.0000 0.0000 0.02162(18) Uani 1 4 d S . . 
I2 I 0.0000 0.0000 0.33272(4) 0.0320(2) Uani 1 2 d S . . 
I1 I 0.2500 0.00183(6) -0.1250 0.0305(2) Uani 1 2 d S . . 
Cu2 Cu 0.0000 0.0000 0.17490(9) 0.0340(3) Uani 1 2 d S . . 
Se1 Se 0.13148(4) -0.00378(5) 0.08973(4) 0.0237(2) Uani 1 1 d . . . 
Cu1 Cu 0.14835(6) 0.10756(6) -0.02395(6) 0.0259(2) Uani 1 1 d . . . 
C5 C 0.3089(6) 0.2120(6) 0.0085(5) 0.0323(16) Uani 1 1 d . . . 
H5A H 0.3350 0.1539 0.0159 0.039 Uiso 1 1 calc R . . 
C1 C 0.1864(5) 0.3014(6) -0.0226(5) 0.0288(14) Uani 1 1 d . . . 
H1A H 0.1241 0.3060 -0.0362 0.035 Uiso 1 1 calc R . . 
C3 C 0.3268(5) 0.3743(6) 0.0052(6) 0.0374(18) Uani 1 1 d . . . 
H3A H 0.3628 0.4271 0.0111 0.045 Uiso 1 1 calc R . . 
C4 C 0.3629(5) 0.2887(6) 0.0179(6) 0.0376(18) Uani 1 1 d . . . 
H4A H 0.4247 0.2823 0.0331 0.045 Uiso 1 1 calc R . . 
C2 C 0.2359(5) 0.3794(5) -0.0164(5) 0.0281(14) Uani 1 1 d . . . 
H2A H 0.2084 0.4363 -0.0268 0.034 Uiso 1 1 calc R . . 
N1 N 0.2216(5) 0.2188(5) -0.0105(4) 0.0302(13) Uiso 1 1 d . . . 
 
loop_ 
 _atom_site_aniso_label 
 _atom_site_aniso_U_11 
 _atom_site_aniso_U_22 
 _atom_site_aniso_U_33 
 _atom_site_aniso_U_23 
 _atom_site_aniso_U_13 
 _atom_site_aniso_U_12 
W1 0.0185(2) 0.0185(2) 0.0278(3) 0.000 0.000 0.000 
I2 0.0307(4) 0.0370(4) 0.0284(5) 0.000 0.000 -0.0019(3) 
I1 0.0309(3) 0.0229(3) 0.0377(4) 0.000 0.0093(2) 0.000 
Cu2 0.0235(6) 0.0515(8) 0.0270(7) 0.000 0.000 0.0001(7) 
Se1 0.0194(3) 0.0222(3) 0.0295(4) -0.0002(3) -0.0009(2) -0.0001(2) 
Cu1 0.0215(4) 0.0206(4) 0.0355(4) 0.0013(3) -0.0008(3) -0.0023(3) 
C5 0.027(4) 0.024(4) 0.046(4) -0.002(3) -0.003(3) 0.002(3) 
C1 0.017(3) 0.032(4) 0.036(4) 0.000(3) 0.000(3) 0.004(3) 
C3 0.019(3) 0.036(4) 0.057(5) -0.010(3) 0.000(3) -0.010(3) 
C4 0.014(3) 0.038(4) 0.061(5) -0.008(4) 0.001(3) -0.005(3) 
C2 0.025(3) 0.020(3) 0.040(4) -0.003(3) -0.007(3) -0.004(2) 
 
_geom_special_details 
; 
 All esds (except the esd in the dihedral angle between two l.s. planes) 
 are estimated using the full covariance matrix.  The cell esds are taken 
 into account individually in the estimation of esds in distances, angles 
 and torsion angles; correlations between esds in cell parameters are only 
 used when they are defined by crystal symmetry.  An approximate (isotropic) 
 treatment of cell esds is used for estimating esds involving l.s. planes. 
; 
 
loop_ 
 _geom_bond_atom_site_label_1 
 _geom_bond_atom_site_label_2 
 _geom_bond_distance 
 _geom_bond_site_symmetry_2 
 _geom_bond_publ_flag 
W1 Se1 2.3986(6) . ? 
W1 Se1 2.3986(6) 3 ? 
W1 Se1 2.3986(6) 4 ? 
W1 Se1 2.3986(6) 2 ? 
W1 Cu2 2.7276(15) . ? 
W1 Cu2 2.7276(15) 3 ? 
W1 Cu1 2.7396(9) 2 ? 
W1 Cu1 2.7396(9) . ? 
W1 Cu1 2.7396(9) 4 ? 
W1 Cu1 2.7396(9) 3 ? 
I2 Cu2 2.4613(16) . ? 
I1 Cu1 2.6838(11) 5_554 ? 
I1 Cu1 2.6838(11) . ? 
Cu2 Se1 2.3578(10) 2 ? 
Cu2 Se1 2.3578(10) . ? 
Se1 Cu1 2.4005(12) 3 ? 
Se1 Cu1 2.4342(11) . ? 
Cu1 N1 1.984(7) . ? 
Cu1 Se1 2.4005(12) 4 ? 
C5 N1 1.331(11) . ? 
C5 C4 1.396(11) . ? 
C1 N1 1.343(11) . ? 
C1 C2 1.371(10) . ? 
C3 C2 1.390(11) . ? 
C3 C4 1.391(13) . ? 
 
loop_ 
 _geom_angle_atom_site_label_1 
 _geom_angle_atom_site_label_2 
 _geom_angle_atom_site_label_3 
 _geom_angle 
 _geom_angle_site_symmetry_1 
 _geom_angle_site_symmetry_3 
 _geom_angle_publ_flag 
Se1 W1 Se1 109.898(16) . 3 ? 
Se1 W1 Se1 109.898(16) . 4 ? 
Se1 W1 Se1 108.62(3) 3 4 ? 
Se1 W1 Se1 108.62(3) . 2 ? 
Se1 W1 Se1 109.898(16) 3 2 ? 
Se1 W1 Se1 109.898(16) 4 2 ? 
Se1 W1 Cu2 54.310(16) . . ? 
Se1 W1 Cu2 125.690(16) 3 . ? 
Se1 W1 Cu2 125.690(16) 4 . ? 
Se1 W1 Cu2 54.310(16) 2 . ? 
Se1 W1 Cu2 125.690(16) . 3 ? 
Se1 W1 Cu2 54.310(16) 3 3 ? 
Se1 W1 Cu2 54.310(16) 4 3 ? 
Se1 W1 Cu2 125.690(16) 2 3 ? 
Cu2 W1 Cu2 180.0 . 3 ? 
Se1 W1 Cu1 135.82(3) . 2 ? 
Se1 W1 Cu1 55.22(3) 3 2 ? 
Se1 W1 Cu1 114.29(3) 4 2 ? 
Se1 W1 Cu1 56.08(3) 2 2 ? 
Cu2 W1 Cu1 97.84(2) . 2 ? 
Cu2 W1 Cu1 82.16(2) 3 2 ? 
Se1 W1 Cu1 56.08(3) . . ? 
Se1 W1 Cu1 114.29(3) 3 . ? 
Se1 W1 Cu1 55.22(3) 4 . ? 
Se1 W1 Cu1 135.82(3) 2 . ? 
Cu2 W1 Cu1 97.84(2) . . ? 
Cu2 W1 Cu1 82.16(2) 3 . ? 
Cu1 W1 Cu1 164.33(4) 2 . ? 
Se1 W1 Cu1 114.29(3) . 4 ? 
Se1 W1 Cu1 135.81(3) 3 4 ? 
Se1 W1 Cu1 56.08(3) 4 4 ? 
Se1 W1 Cu1 55.22(3) 2 4 ? 
Cu2 W1 Cu1 82.16(2) . 4 ? 
Cu2 W1 Cu1 97.84(2) 3 4 ? 
Cu1 W1 Cu1 91.065(5) 2 4 ? 
Cu1 W1 Cu1 91.065(5) . 4 ? 
Se1 W1 Cu1 55.22(3) . 3 ? 
Se1 W1 Cu1 56.08(3) 3 3 ? 
Se1 W1 Cu1 135.82(3) 4 3 ? 
Se1 W1 Cu1 114.29(3) 2 3 ? 
Cu2 W1 Cu1 82.16(2) . 3 ? 
Cu2 W1 Cu1 97.84(2) 3 3 ? 
Cu1 W1 Cu1 91.065(5) 2 3 ? 
Cu1 W1 Cu1 91.065(5) . 3 ? 
Cu1 W1 Cu1 164.33(4) 4 3 ? 
Cu1 I1 Cu1 108.60(5) 5_554 . ? 
Se1 Cu2 Se1 111.43(6) 2 . ? 
Se1 Cu2 I2 124.29(3) 2 . ? 
Se1 Cu2 I2 124.29(3) . . ? 
Se1 Cu2 W1 55.71(3) 2 . ? 
Se1 Cu2 W1 55.71(3) . . ? 
I2 Cu2 W1 180.0 . . ? 
Cu2 Se1 W1 69.98(3) . . ? 
Cu2 Se1 Cu1 98.05(4) . 3 ? 
W1 Se1 Cu1 69.62(3) . 3 ? 
Cu2 Se1 Cu1 118.62(4) . . ? 
W1 Se1 Cu1 69.06(3) . . ? 
Cu1 Se1 Cu1 107.95(3) 3 . ? 
N1 Cu1 Se1 114.2(2) . 4 ? 
N1 Cu1 Se1 122.8(2) . . ? 
Se1 Cu1 Se1 108.64(4) 4 . ? 
N1 Cu1 I1 103.9(2) . . ? 
Se1 Cu1 I1 109.61(4) 4 . ? 
Se1 Cu1 I1 95.16(4) . . ? 
N1 Cu1 W1 155.1(2) . . ? 
Se1 Cu1 W1 55.16(2) 4 . ? 
Se1 Cu1 W1 54.86(2) . . ? 
I1 Cu1 W1 100.99(3) . . ? 
N1 C5 C4 121.2(8) . . ? 
N1 C1 C2 123.4(7) . . ? 
C2 C3 C4 117.1(7) . . ? 
C3 C4 C5 120.5(8) . . ? 
C1 C2 C3 119.3(7) . . ? 
C5 N1 C1 118.5(7) . . ? 
C5 N1 Cu1 119.5(6) . . ? 
C1 N1 Cu1 122.0(6) . . ? 
 
_diffrn_measured_fraction_theta_max    0.993 
_diffrn_reflns_theta_full              25.00 
_diffrn_measured_fraction_theta_full   0.993 
_refine_diff_density_max    2.389 
_refine_diff_density_min   -2.230 
_refine_diff_density_rms    0.359 
